# Supplementary material for: The Damage Caused by Decline Disease in Bayberry Plants through Changes in Soil Properties, Rhizosphere Microbial Community Structure and Metabolites
Source: Plants (Basel). 2021 Sep 30;10(10):2083. doi: 10.3390/plants10102083 (PMC8540645; doi:10.3390/plants10102083)
Supplement: Supplementary file 1 [file plants-10-02083-s001.zip › plants-1350310-supplementary.pdf]

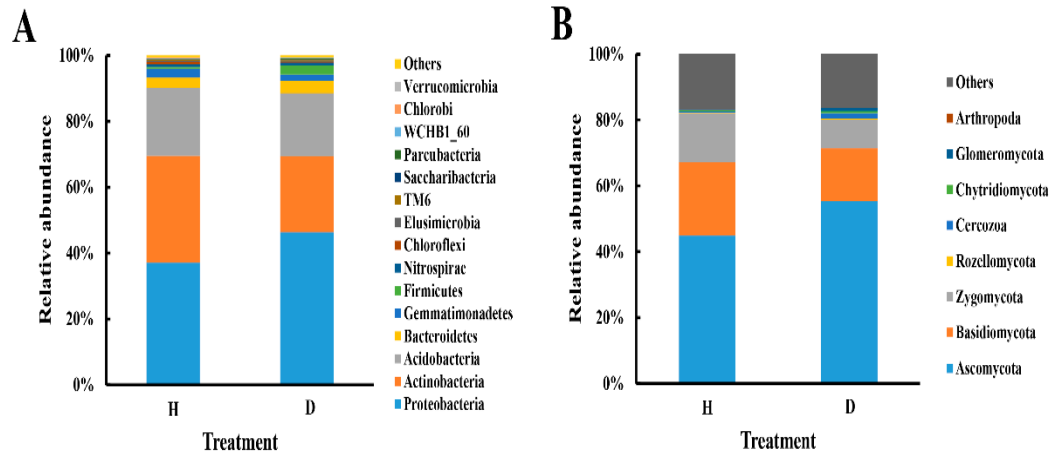

**Figure S1.** Relative abundance of bacteria (A) and fungi (B) at the phylum level. H and D represented healthy tree and diseased trees, respectively.

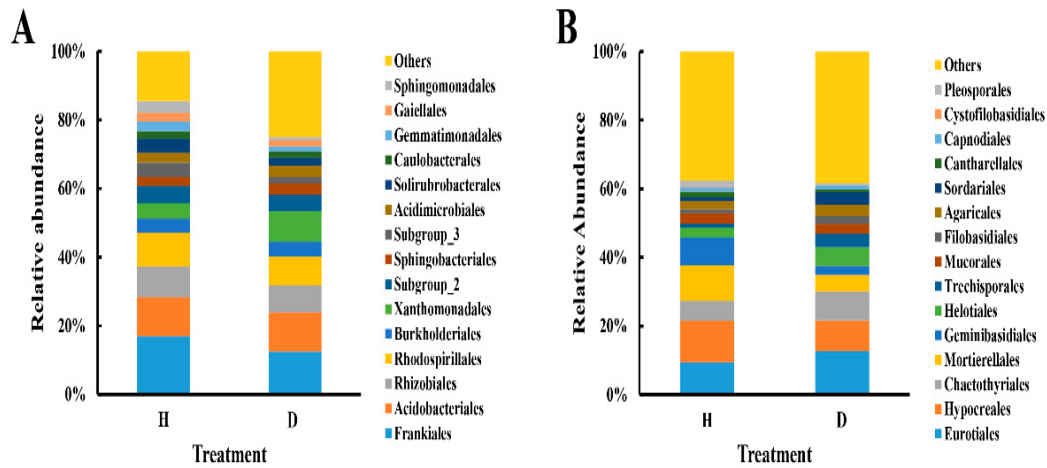

**Figure S2.** Relative abundance of bacteria (A) and fungi (B) at the order level. H and D represented healthy tree and diseased trees, respectively.

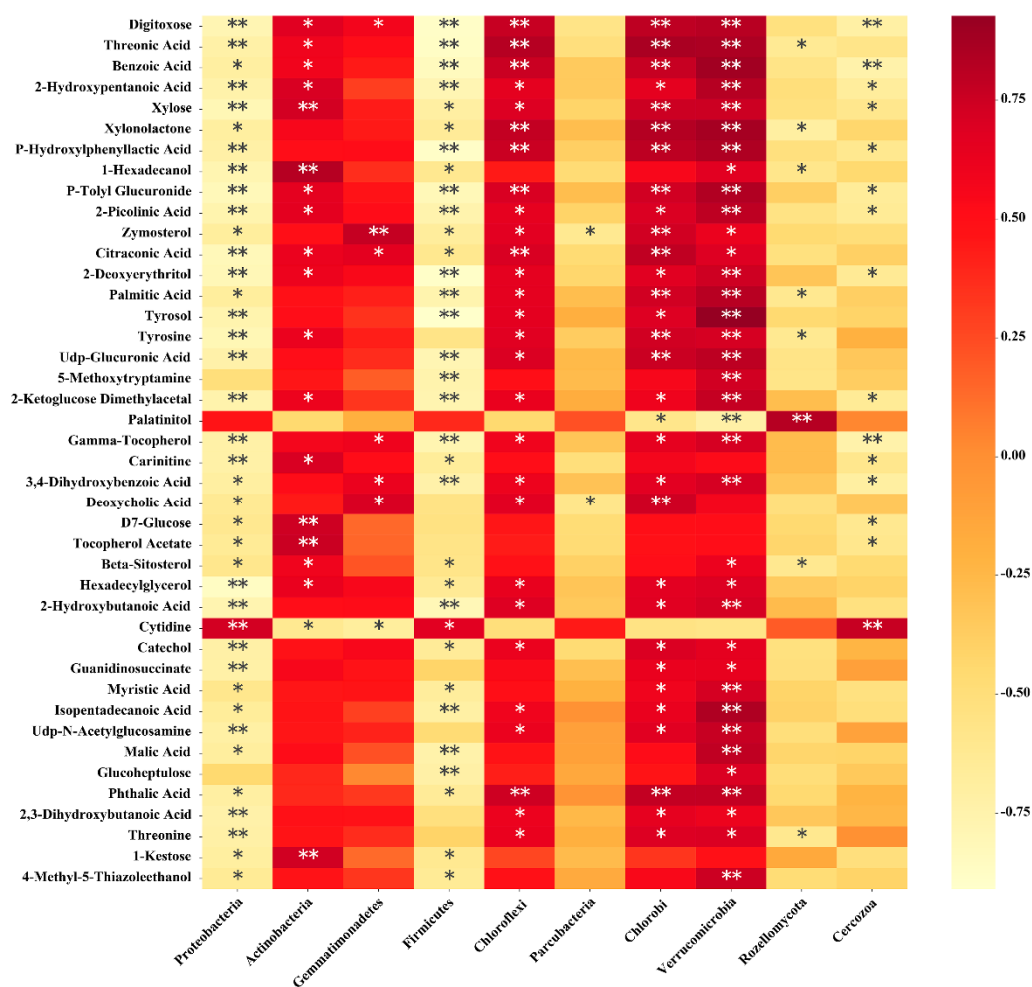

**Figure S3.** Heatmap of correlation analysis between the microorganism relative abundances at phylum level and the metabolite relative contents. \* and \*\* indicate a significant correlation at  $P < 0.05$  and  $P < 0.01$ , respectively.

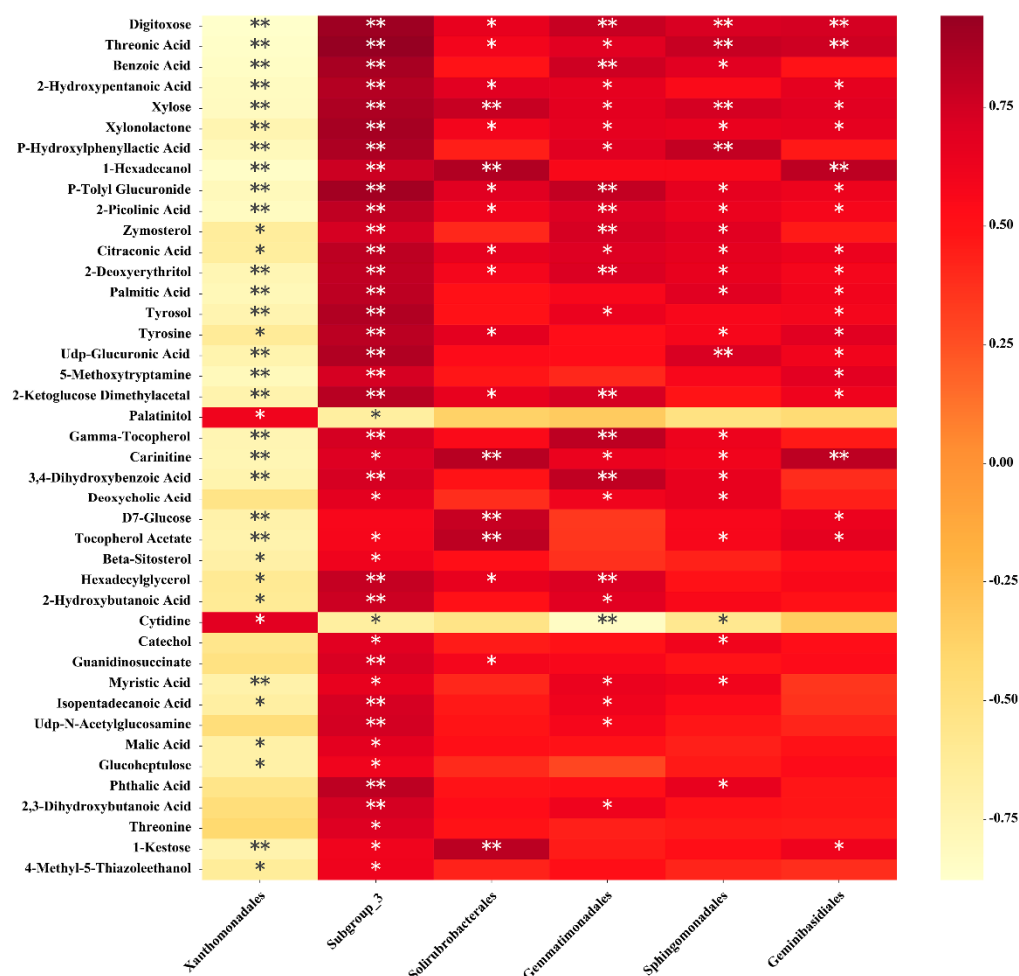

**Figure S4.** Heatmap of correlation analysis between the microorganism relative abundances at order level and the metabolite relative contents. \* and \*\* indicate a significant correlation at  $P < 0.05$  and  $P < 0.01$ , respectively.
